# Supplementary material
Source: PubMed Central journal article supplement (PMC8085026)
Supplement: NIHMS1671216-supplement-1.pdf [file NIHMS1671216-supplement-1.pdf]

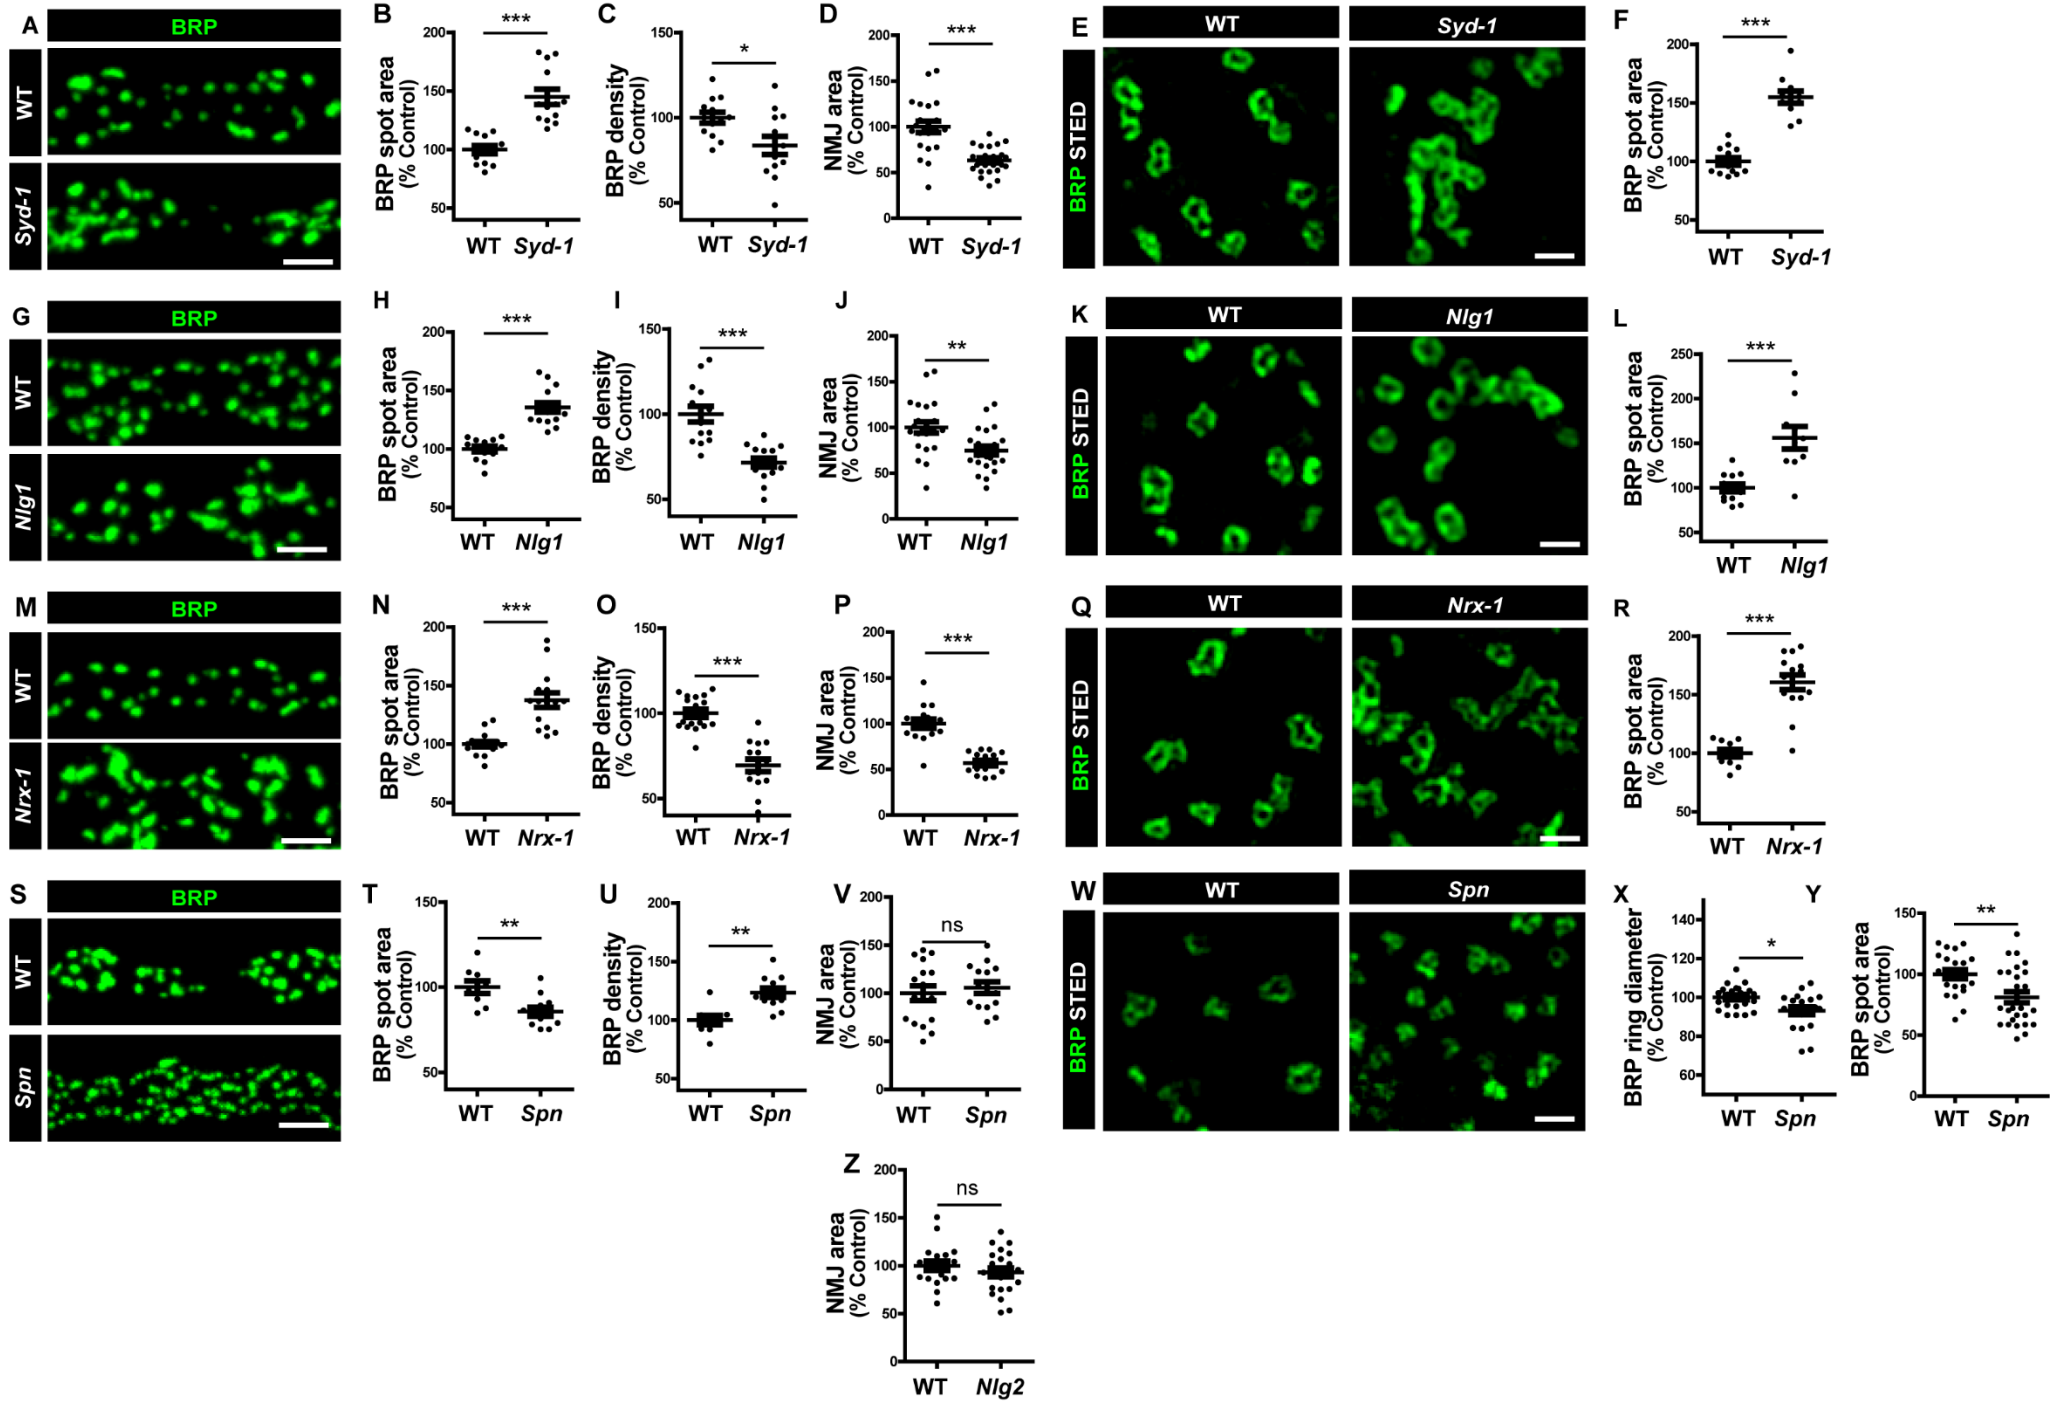

**Figure S1. *Syd-1*, *Nlg1* and *Nrx-1* mutant phenotypes are similar. *Spn* and *Nlg2* mutant phenotypes are similar. Related to figures 1 and 2.**

(A,G,M,S) Representative images of 3<sup>rd</sup> instar larval muscle 4 NMJs immunostained with an antibody against BRP. Scale bars: 2 $\mu$ m. (A-D) *Syd-1*, (G-J) *Nlg1* and (M-P) *Nrx-1* mutants show sparse, overgrown AZs and smaller NMJ areas. (S-U) *Spn* mutants show supernumerary, smaller AZs. (V,Z) *Spn* and *Nlg2* mutants show no change in NMJ areas. (E,K,Q,W) BRP scaffolds resolved through STED microscopy show (E-F) *Syd-1*, (K-L) *Nlg1* and (Q-R) *Nrx-1* mutants show large, clumsy BRP scaffolds while (W-Y) *Spn* mutants show smaller BRP scaffolds compared to controls.

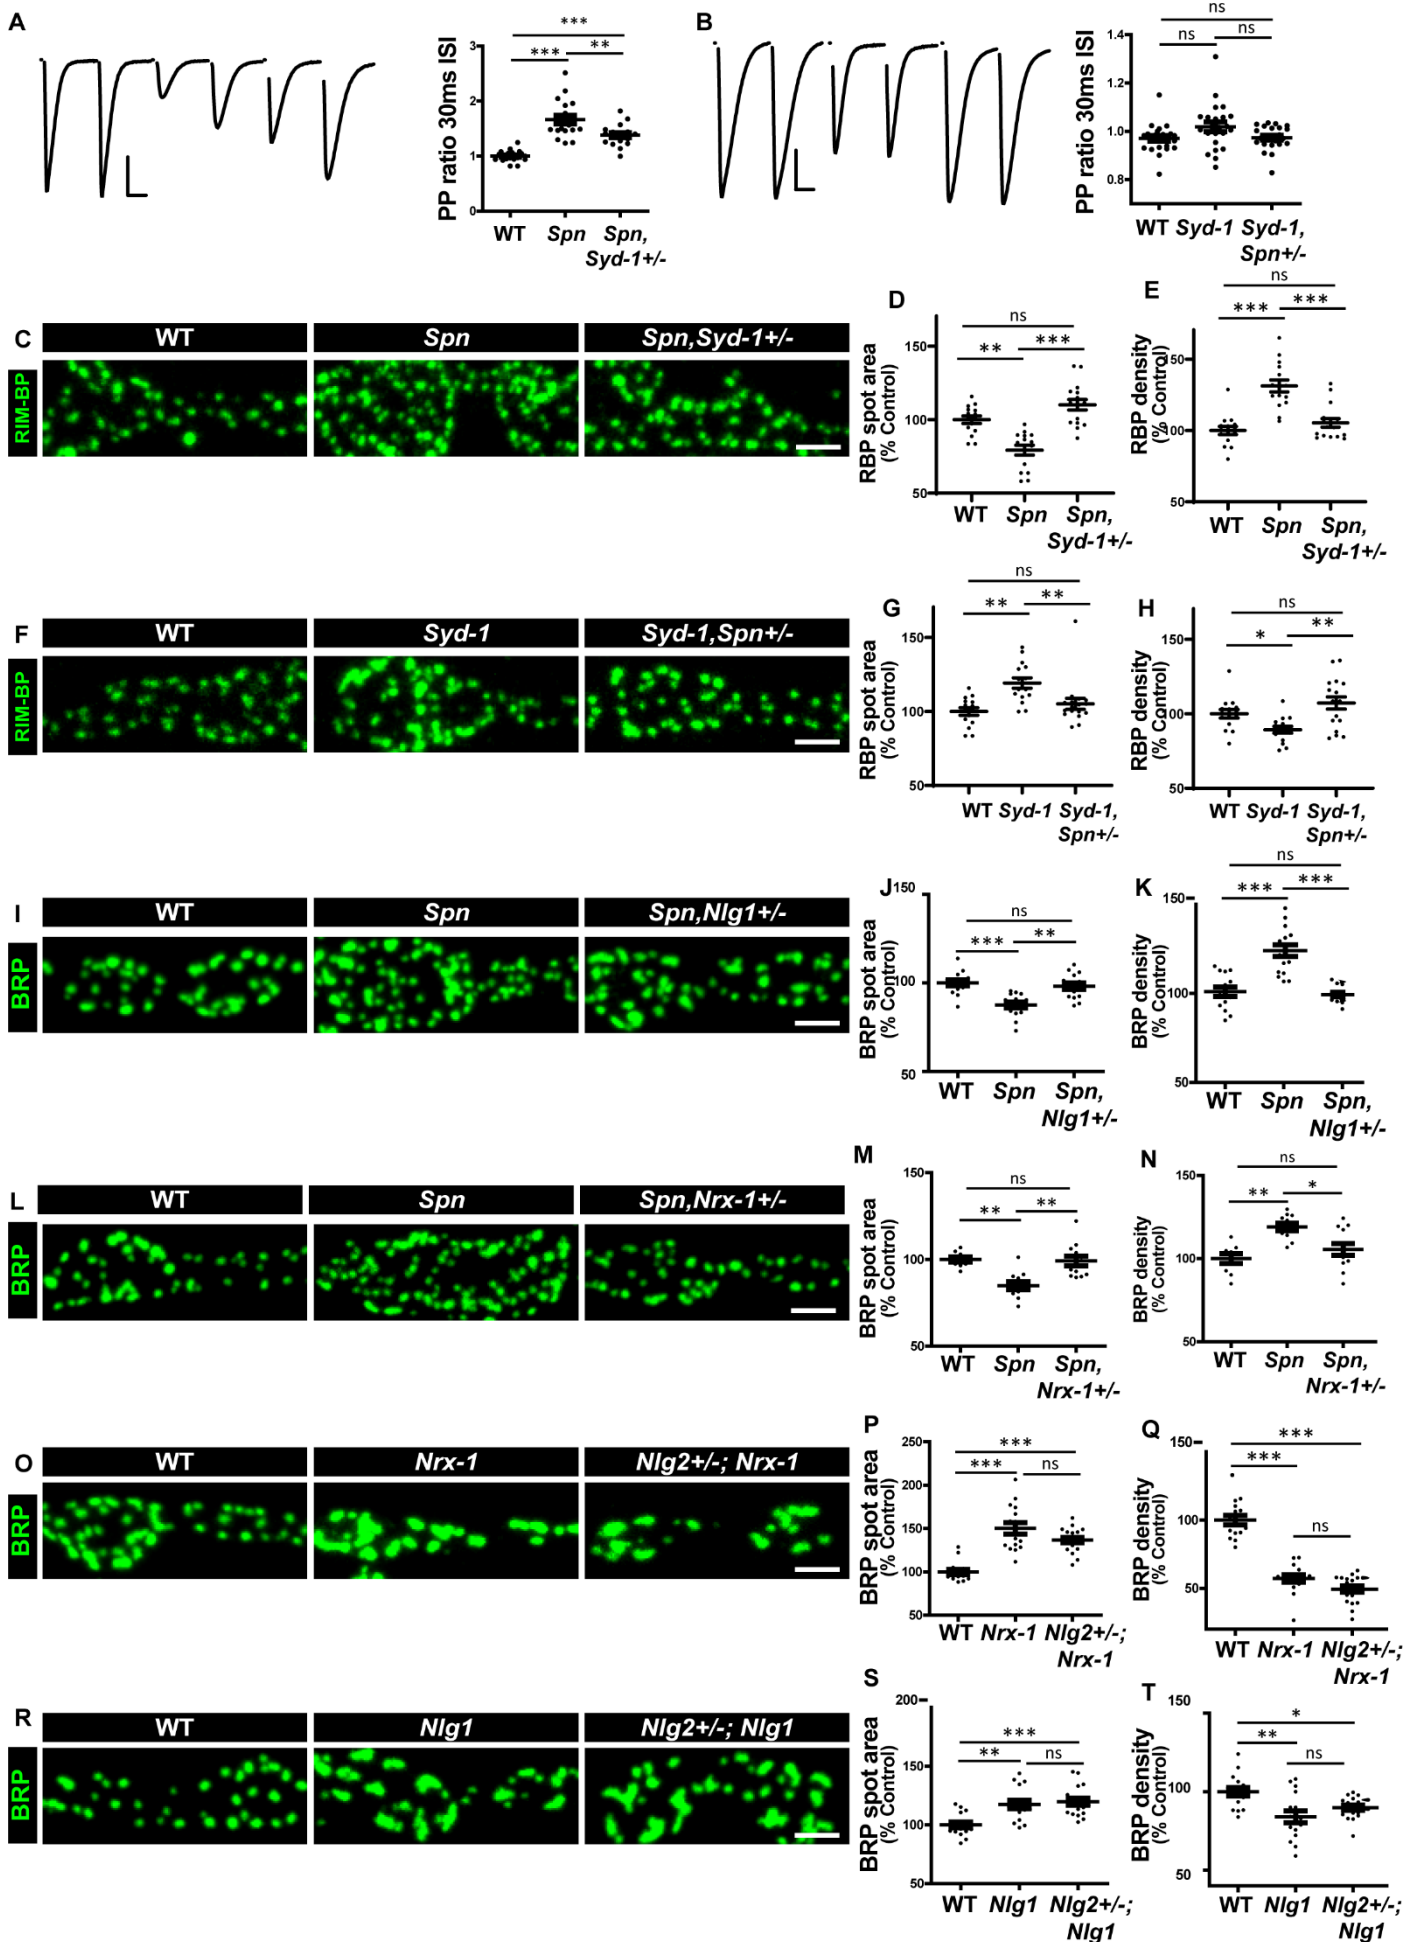

**Figure S2. Syd-1/Nlg1 and Spn/Nlg2 take on antagonistic trans-synaptic signalling roles in presynapse development. Related to figures 1 and 2.**

(A,B) Representative traces of paired-pulse (inter stimulus interval (ISI) of 30ms) measurements at muscle 6/7 NMJs. Scale bars: 10ms, 20mV. (A) Increased paired pulse ratio (30ms PPI) of *Spn* mutants is rescued by *Syd-1* heterozygosity. (B) Paired pulse ratio (30ms PPI) is unchanged in *Syd-1* mutants. (C-R) Representative images of 3<sup>rd</sup> instar larval muscle 4 NMJs immunostained with antibodies against RIM-BP or BRP. Scale bars: 2 $\mu$ m. Quantification of RIM-BP spot area and density show that *Spn* and *Syd-1* mutant phenotypes are rescued by (C-E) *Syd-1* and (F-H) *Spn* heterozygosity, respectively. Quantification of BRP spot area density show that *Spn* mutant phenotype is suppressed by (I-K) *Nlg1* and (L-M) *Nrx-1* heterozygosity. (O-Q) *Nrx-1* and (R-T) *Nlg1* mutant phenotypes are suppressed by *Nlg2* heterozygosity.

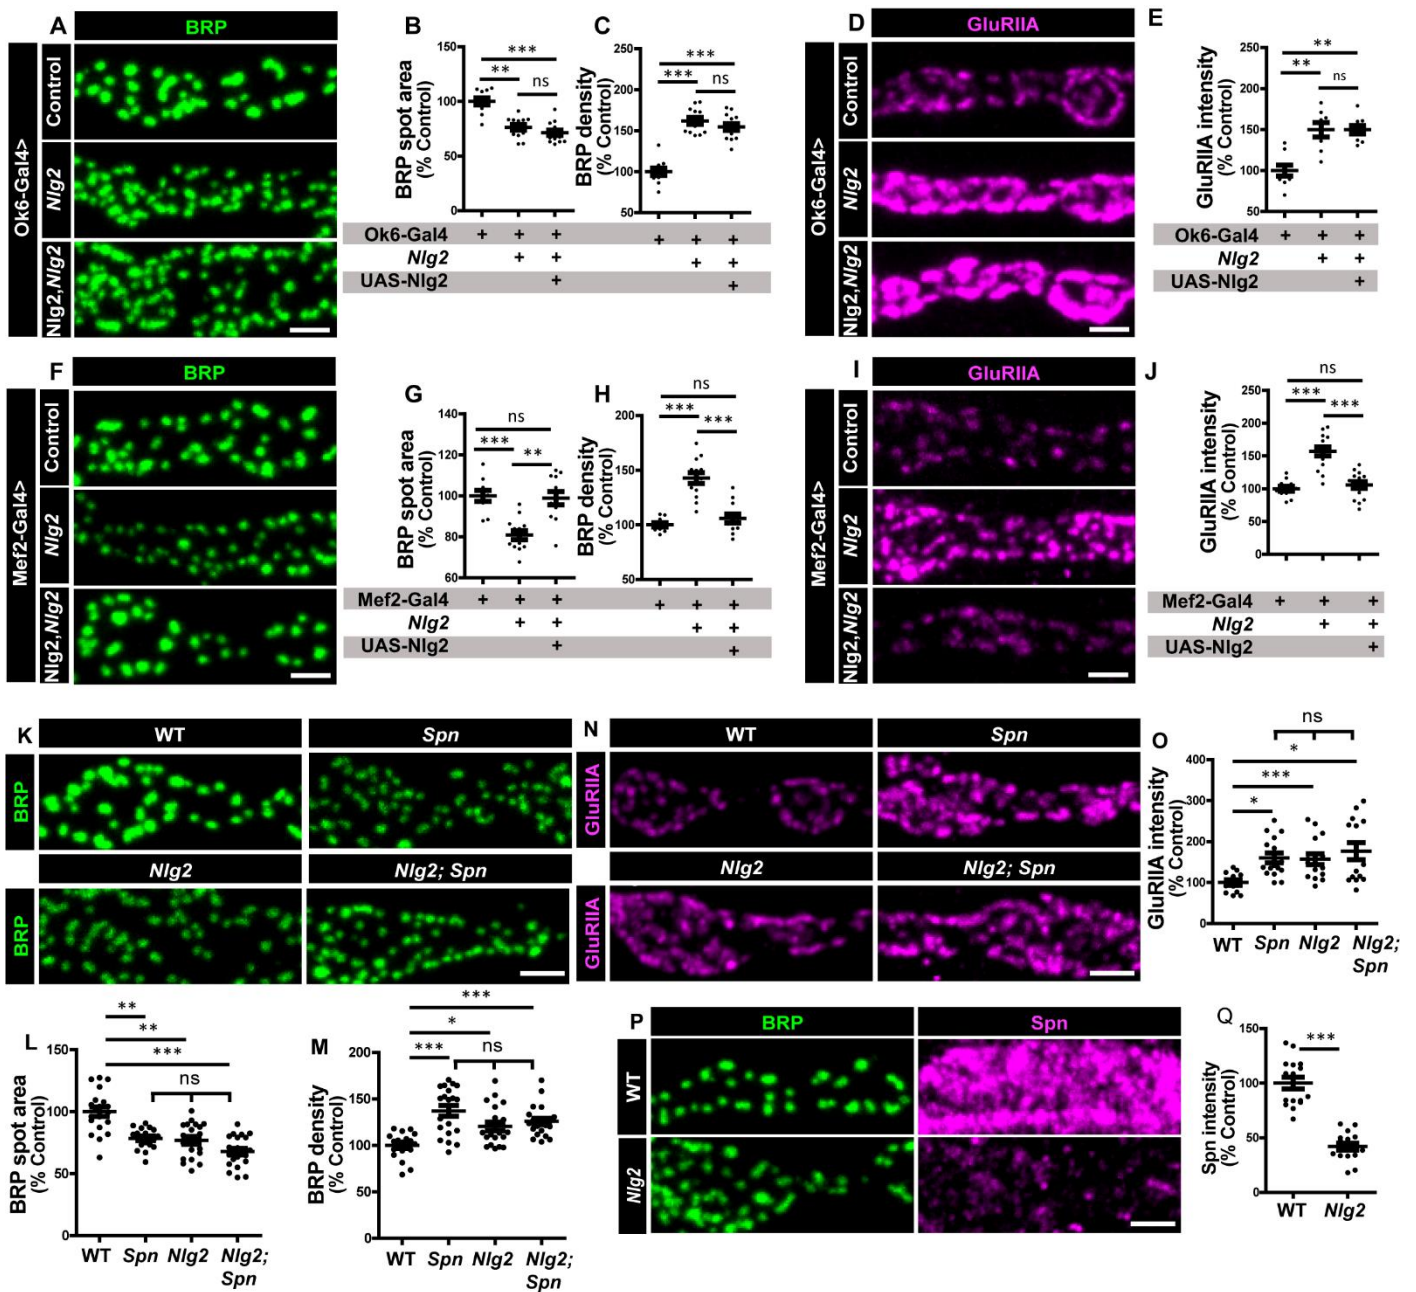

**Figure S3. *Nlg2* phenotype is rescued by transgenic expression of *Nlg2* in the postsynaptic muscle cell. Related to figure 2.**

Representative images of 3<sup>rd</sup> instar larval muscle 4 NMJs immunostained with antibodies against BRP (green) and, (A-N) GluRIIA (magenta) or (P) Spn (magenta). Scale bars: 2µm. Quantification of BRP spot area and density, and GluRIIA intensity, show that *Nlg2* mutant phenotype is rescued by reexpression of *Nlg2* in the (F-J) muscle, but not in the (A-E) motoneuron. (K-O) Double mutants of *Spn* and *Nlg2* are non-additive in their BRP and GluRIIA phenotypes. (P-Q) *Nlg2* mutants show lower levels of Spn.



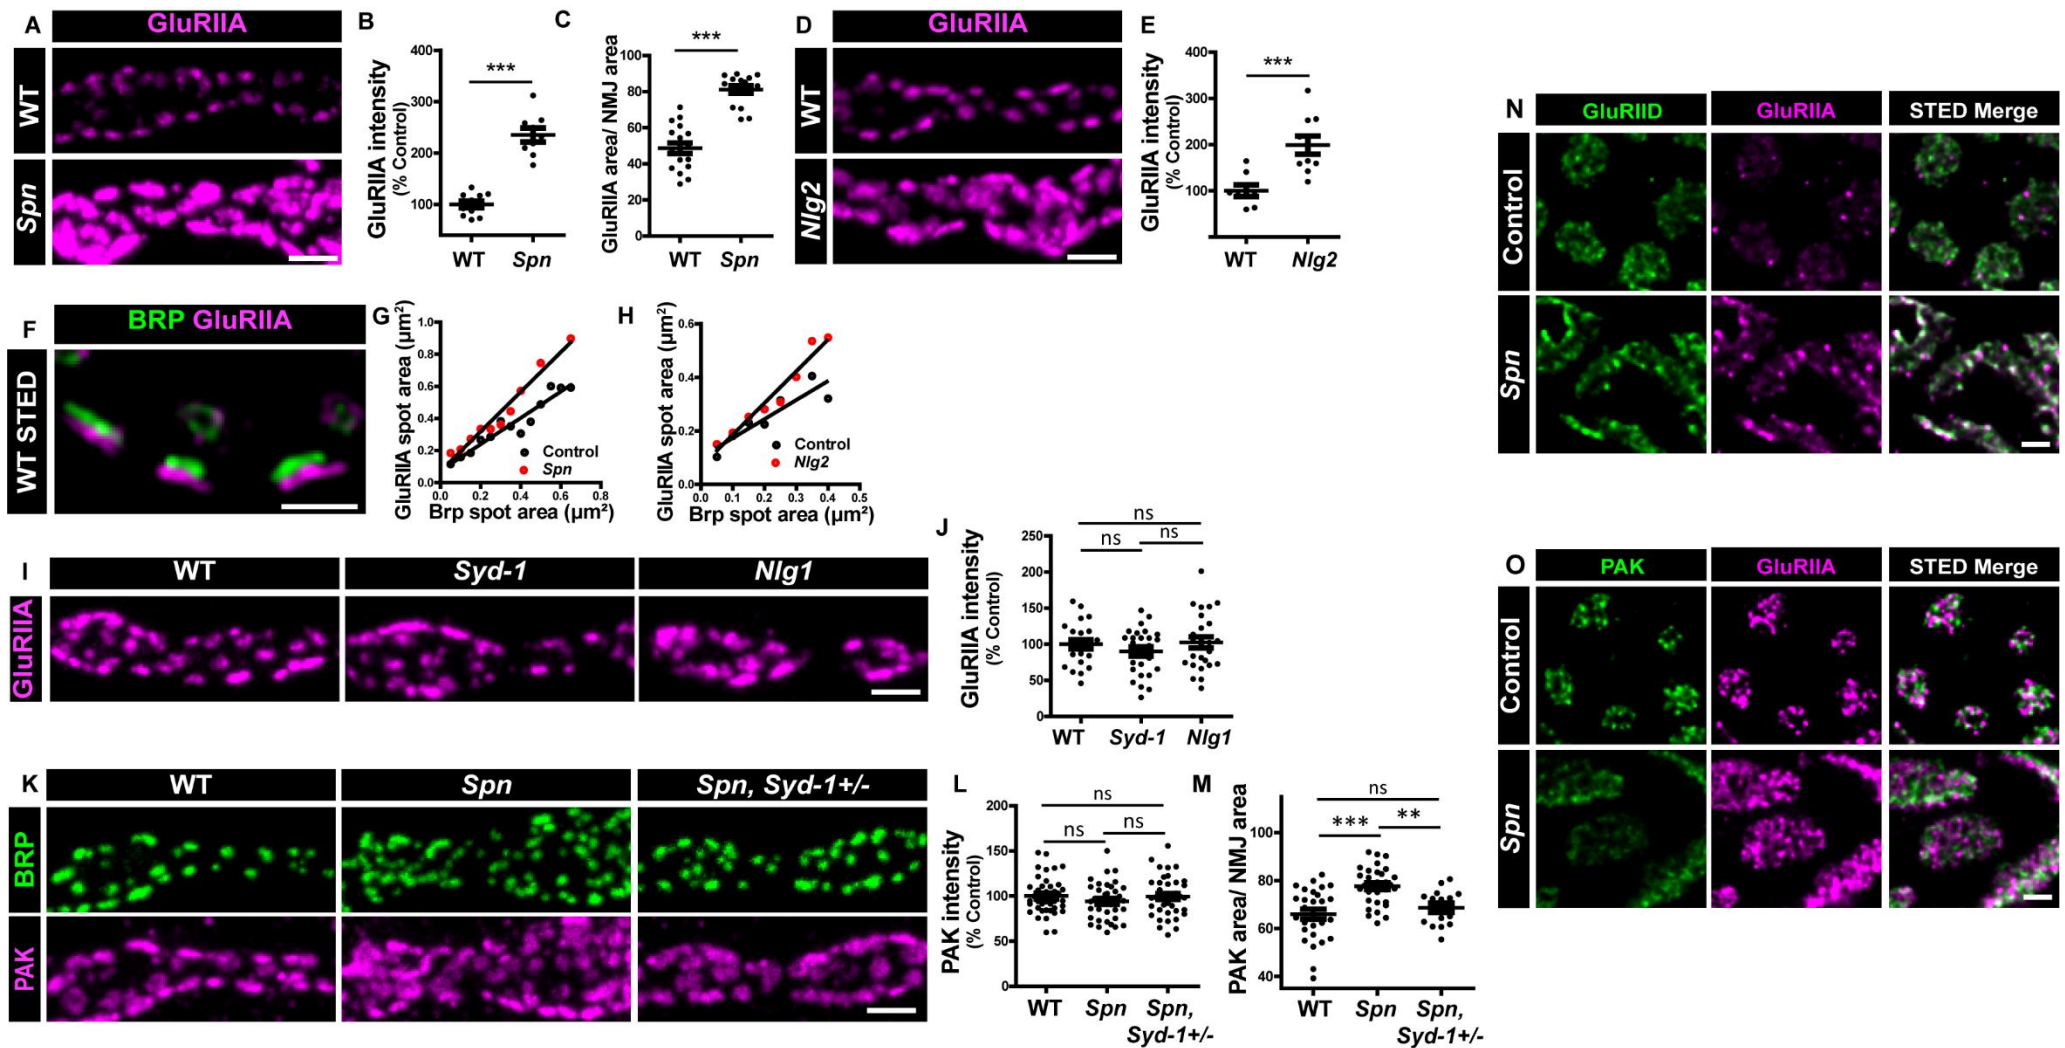

**Figure S4. *Syd-1*, *Nlg1* and *Nrx-1* mutant phenotypes are similar. *Spn* and *Nlg2* mutant phenotypes are similar. Excessive GluRIIA in *Spn* mutants is part of the PSD. Related to figure 3.**

(A,D,I) Representative images of 3<sup>rd</sup> instar larval muscle 4 NMJs immunostained with antibodies against GluRIIA. Scale bars: 2 $\mu\text{m}$ . (A-B) *Spn* and (D-E) *Nlg2* mutants show higher levels of GluRIIA. (C) Quantification of the ratio of GluRIIA receptor field area to NMJ area shows overgrown receptor fields in *Spn* mutants. (F) STED microscopy of BRP and GluRIIA show pre- and post-synapse matching. Scale bar: 500nm.

(G,H) Linear regression lines fit to BRP spot area plotted against GluRIIA field area show that *Spn* and *Nlg2* mutants accumulate excessive GluRIIA opposite BRP scaffolds. (I) *Syd-1* and *Nlg1* mutants accumulate GluRIIA to wildtype levels. (K) Representative images of NMJs immunostained with antibodies against BRP (green) and PAK (magenta). Scale bars: 2 $\mu$ m. (L) PAK intensity is unchanged in *Spn* mutants, but (M) the area of NMJ covered by PAK increases in *Spn* mutants, suppressed by *Syd-1* heterozygosity. (N) GluRIIA and GluRIID, which form a complex in vivo colocalize in WT and *Spn* mutants. (O) GluRIIA and PAK also colocalize in WT and *Spn* mutants. Scale bar: 500nm.

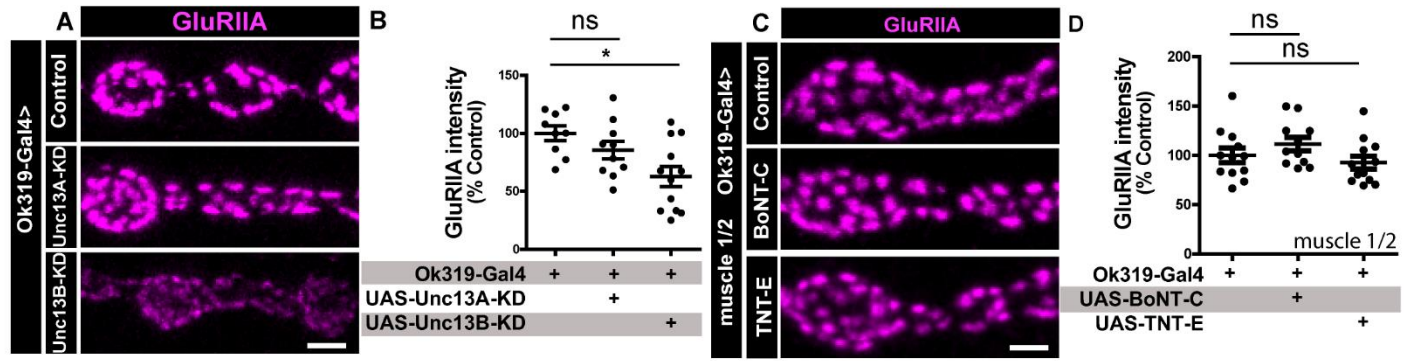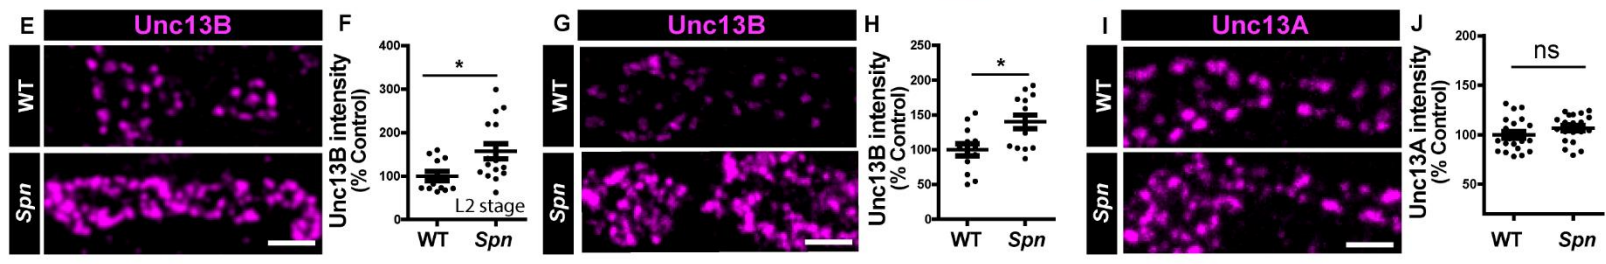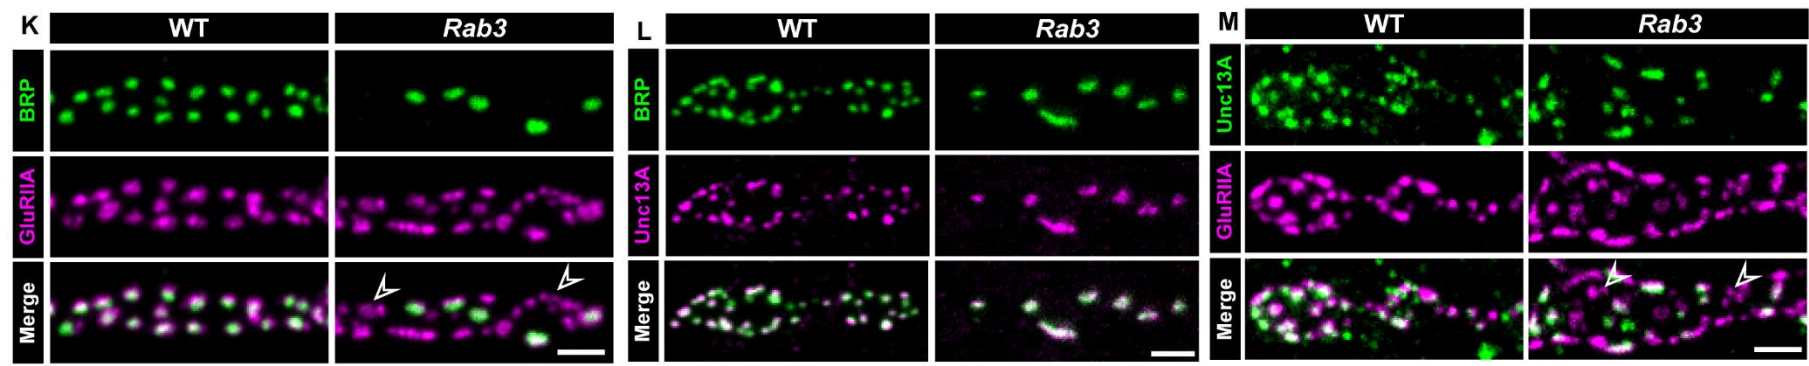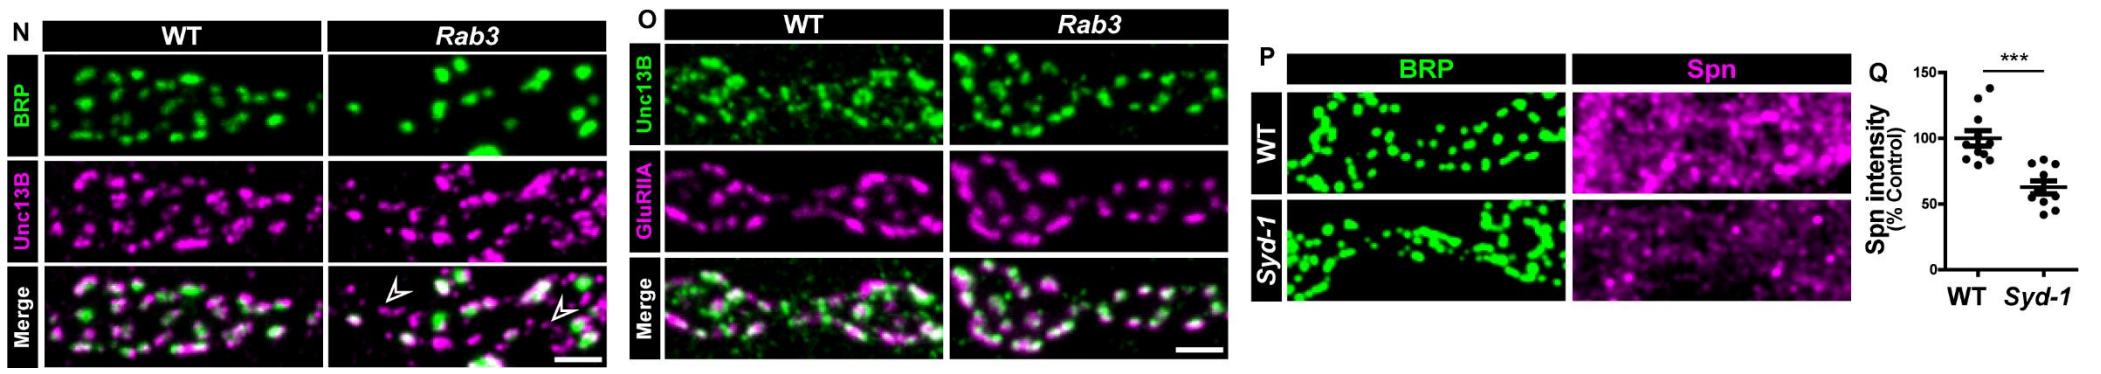



**Figure S5. Spn mutants have higher Unc13B protein levels. Unc13B facilitates GluRIIA incorporation in absence of Unc13A. *Syd-1* mutants show lower levels of Spn. Related to figures 4 and 5.**

(A-P) Representative images of NMJs immunostained with antibodies as mentioned in the figure. Scale bars: 2 $\mu$ m. (A-B) Motoneuronal KD of *Unc13B* impairs GluRIIA accumulation, but KD of Unc13A has no effect. (C-D) Ok319-Gal4 driving UAS-BoNT-C and UAS-TNT-E shows no change in GluRIIA intensity in muscles 1/2. (E-J) *Spn* mutants show elevated Unc13B levels in both L2 and L3 larval developmental stages, while Unc13A levels remain unchanged. (K) BRP and GluRIIA accumulate in half the available synapses in *Rab3* mutants; GluRIIA also accumulates in the other half unopposed by BRP. (L) Unc13A colocalizes with BRP (M) Not all GluRIIA fields are apposed by Unc13A in *Rab3*. (N) Unc13B accumulates in spots negative for BRP in *Rab3*. (O) All GluRIIA fields are apposed by Unc13B in both *Rab3* mutants and controls. (P-Q) Quantification of Spn intensity in *Syd-1* mutants shows that *Syd-1* mutants accumulate Spn to lower levels compared to controls.

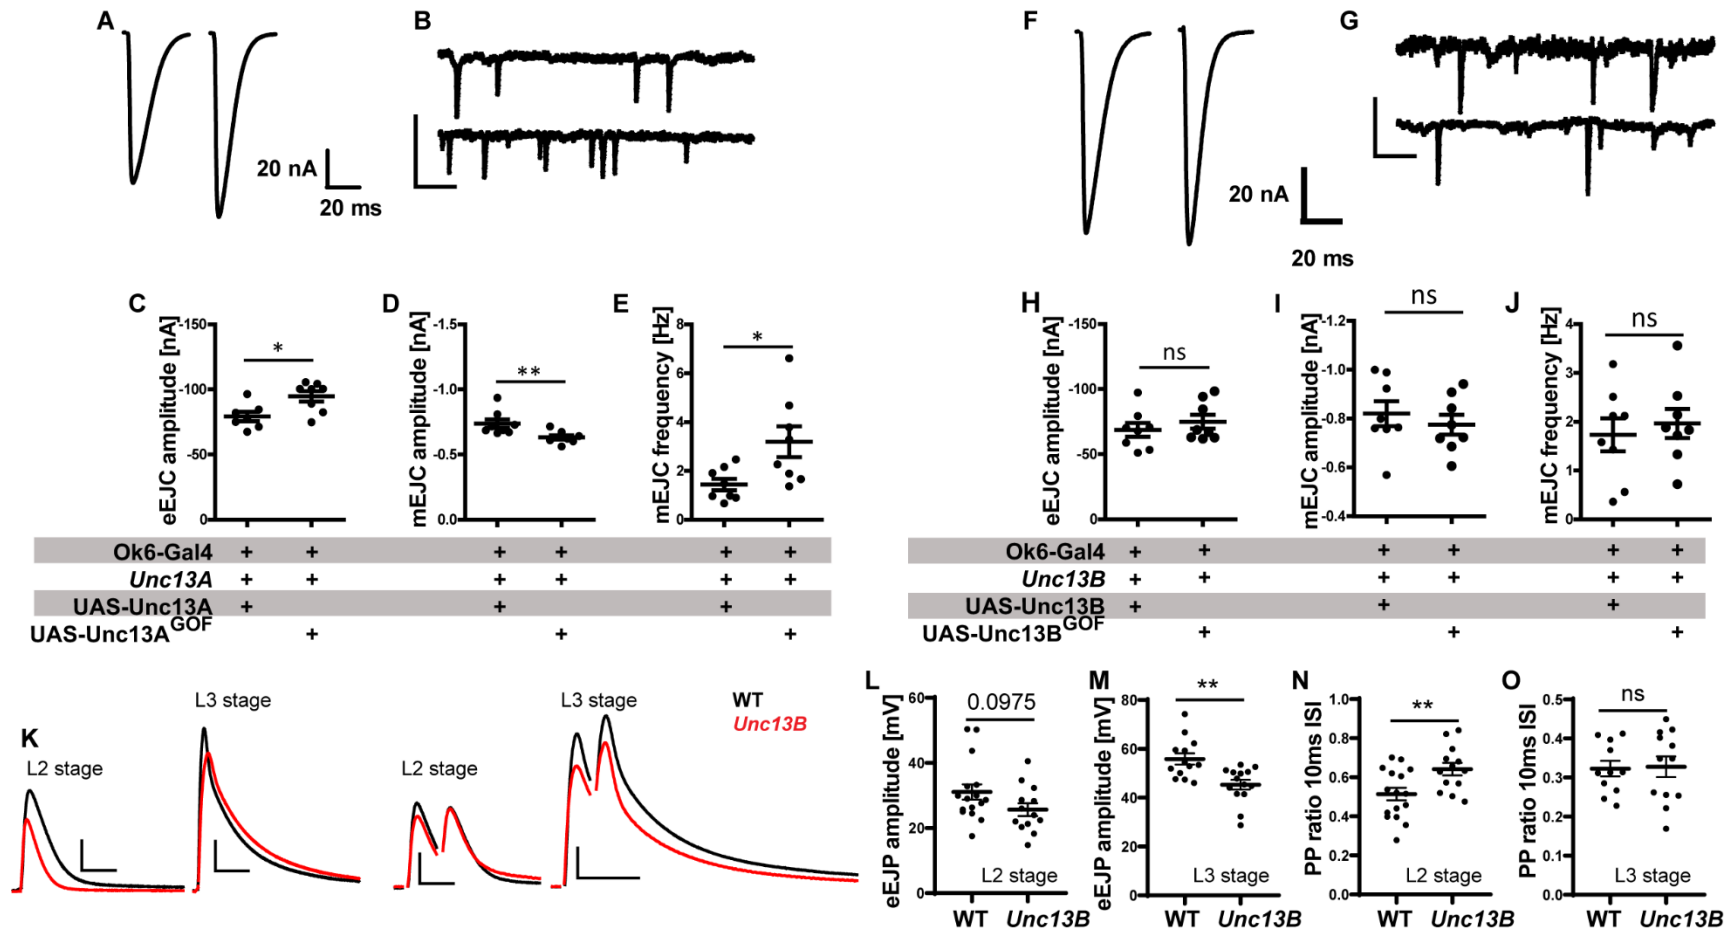

**Figure S6. Gain-of-function mutation in Unc13A results in increased evoked and spontaneous release. Related to figure 5.**

(A) Representative eEJC traces and (B) mEJC traces for motoneuron expression of Unc13A and Unc13A<sup>GOF</sup> constructs in *Unc13A* mutants. (C) eEJC amplitudes are higher, (D) mEJC amplitudes are lower and (E) mEJC frequency is higher upon reexpression of Unc13A<sup>GOF</sup> construct in *Unc13A* mutants compared to controls. (F) Representative eEJC traces and (G) Representative mEJC

traces for motoneuron expression of Unc13B and Unc13B<sup>GOF</sup> constructs in *Unc13B* mutants. (H) eEJC amplitudes, (I) mEJC amplitudes and (J) mEJC frequency are all unchanged upon reexpression of Unc13B<sup>GOF</sup> construct in *Unc13B* mutants compared to controls. (K) Representative traces of eEJP and paired-pulse (inter stimulus interval (ISI) of 10ms) measurements at larval muscle 6/7 NMJs of L2/L3 developmental stages. eEJP amplitudes are lower in *Unc13B* mutants at both (L) L2 and (M) L3 larval stages. PP ratio (10ms ISI) in *Unc13B* mutants is higher at (N) L2, but not (O) L3 developmental stage.
